# Supplementary material for: New members of layered oxychloride perovskites with square planar coordination: Sr2MO2Cl2 (M = Mn, Ni) and Ba2PdO2Cl2
Source: Royal Society of Chemistry journal article supplement (doi:10.1039/c4cc01422g), 2014-01-01
Supplement: c4cc01422g1.pdf [file c4cc01422g1.pdf]

## Supplementary Information

### New Members of Layered Oxychloride Perovskites with Square Planar Coordination: $\text{Sr}_2\text{MO}_2\text{Cl}_2$ ( $M = \text{Mn}, \text{Ni}$ ) and $\text{Ba}_2\text{PdO}_2\text{Cl}_2$

Y. Tsujimoto<sup>a</sup> C. I. Sathish<sup>b</sup> Y. Matsushita<sup>c</sup> K. Yamaura<sup>b</sup> and T. Uchikoshi<sup>a</sup>

<sup>a</sup> Materials Processing Unit, National Institute for Materials Science (NIMS), 1-2-1 Sengen, Tsukuba, Ibaraki 305-0047, Japan.

<sup>b</sup> Superconducting Properties Unit, NIMS, 1-1 Namiki, Tsukuba, Ibaraki 305-0044, Japan.

<sup>c</sup> Materials Analysis Station, NIMS, 1-2-1 Sengen, Tsukuba, Ibaraki 305-0047, Japan.

- Reinvestigation of the structural model for  $\text{Sr}_2\text{MnO}_2\text{Cl}_2$ .

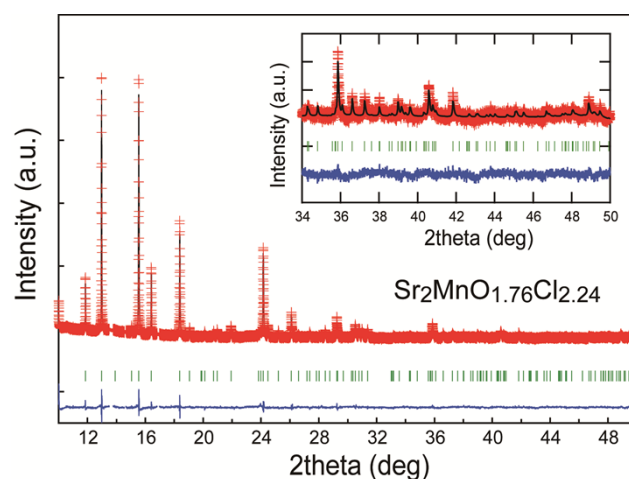

Fig. S1 Rietveld refinement against the synchrotron X-ray diffraction data collected from  $\text{Sr}_2\text{MnO}_2\text{Cl}_2$  on the basis of a model with mixed anion at the equatorial sites.

Table. S1. Crystallographic data for  $\text{Sr}_2\text{MnO}_2\text{Cl}_2$  from Rietveld refinement of synchrotron X-ray diffraction data on the assumption of mixed anions at the equatorial sites.

| Atom                 | Site             | Occupancy            | $z$         | $B_{\text{iso}}$ (Å) |
|----------------------|------------------|----------------------|-------------|----------------------|
| Sr                   | (0,0, $z$ ) $4e$ | 1                    | 0.38711(10) | 1.64(3)              |
| Mn                   | (0,0,0) $2a$     | 1                    | —           | 1.88(8)              |
| O                    | (0,1/2,0) $4c$   | 0.88(1) <sup>a</sup> | —           | 1.5(2) <sup>b</sup>  |
| Cl1                  | (0,1/2,0) $4c$   | 0.12 <sup>a</sup>    | —           | 1.5 <sup>b</sup>     |
| Cl2                  | (0,0, $z$ ) $4e$ | 1                    | 0.1848(2)   | 0.80(6)              |
| $a$ (Å)              |                  |                      |             | 4.10225(3)           |
| $c$ (Å)              |                  |                      |             | 15.01160(11)         |
| $R_{\text{wp}}$ (%)  |                  |                      |             | 1.49                 |
| $R_B$ (%)            |                  |                      |             | 7.84                 |
| $S$                  |                  |                      |             | 2.01                 |
| Mn–O (Å)             |                  |                      |             | 2.05113(1)           |
| Mn–Cl (Å)            |                  |                      |             | 2.775(4)             |
| Sr–O (Å)             |                  |                      |             | 2.6606(10)           |
| Sr–Cl $\times$ 2 (Å) |                  |                      |             | 3.0953(14), 3.036(4) |

<sup>a</sup> Occupancies of O and Cl1 was constrained to one in total. <sup>b</sup> The values of  $B_{\text{iso}}$  for O and Cl1 were constrained to the same one.

- Reinvestigation of the magnetic susceptibility ( $\chi$ ) of the Mn phase. The magnetization data is normalized using the formula weight of the chemical composition determined by the Rietveld refinement shown in Fig. S1 and Table S1.

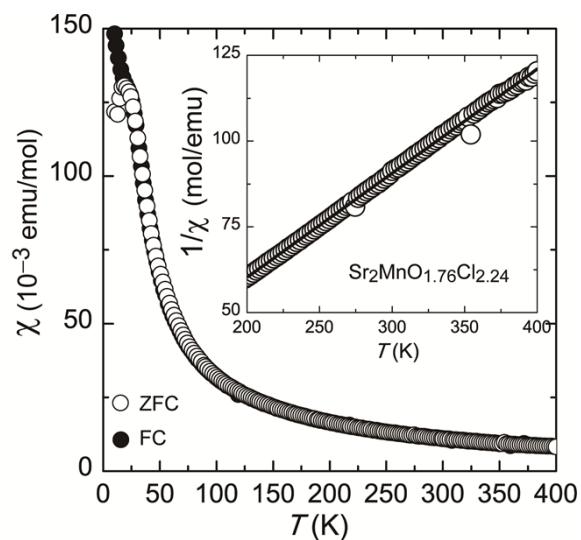

Fig. S2 Magnetic susceptibility of ‘ $\text{Sr}_2\text{MnO}_{1.76}\text{Cl}_{2.24}$ ’. Open and solid circles represent the data measured under zero-field cooled (ZFC) and field cooled (FC) conditions. The inset shows the inverse susceptibility (open circles) and Curie-Weiss fit (solid line). The estimated Curie constant and Weiss temperature are  $C = 3.29(1)$  emu K/mol and  $\theta = 1.5(11)$  K, respectively.
